# Supplementary material
Source: PubMed Central journal article supplement (PMC7773391)
Supplement: jci-131-140424-s602.pdf [file jci-131-140424-s602.pdf]

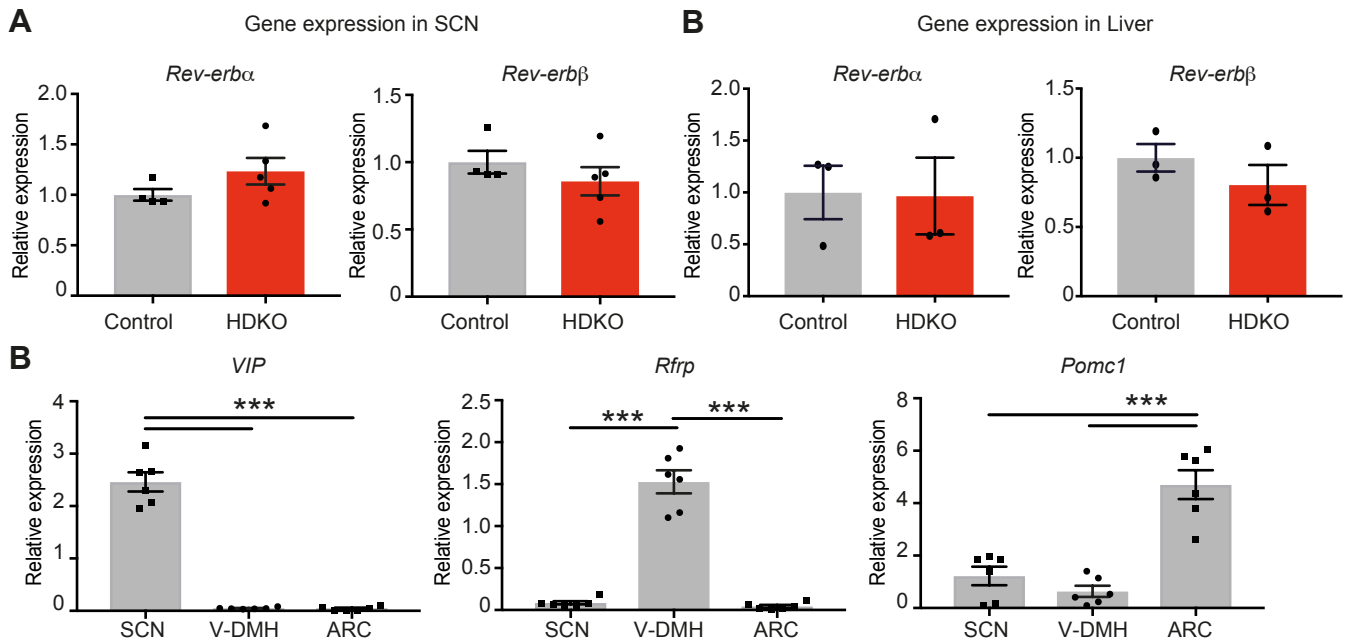

**Supplemental Figure 1. REV-ERBs expression in SCN and liver are maintained in HDKO mice.** **A.** *Reverbα* and *Reverbβ* gene expression in SCN from HDKO mice compared to their control littermates on NCD at ZT4 (n = 4-5, mean +/- SEM). Results were compared by Mann Whitney test. **B.** *Reverbα* and *Reverbβ* gene expression in liver from HDKO mice compared to their control littermates on NCD at ZT10 (n = 3, mean +/- SEM). Results were compared by Mann Whitney test. **C.** *Vip* (SCN-specific), *Rfrp* (VMH/DMH-specific) and *Pomc1* (ARC-specific) genes expression in SCN, VMH/DMH and ARC hypothalamic nucleus punch-out in control and HDKO mice on NCD at ZT4 (n = 6, mean +/- SEM). Results were compared by one-way ANOVA and Holm-Sidak's multiple comparisons test. \*\*\*P < 0.001.

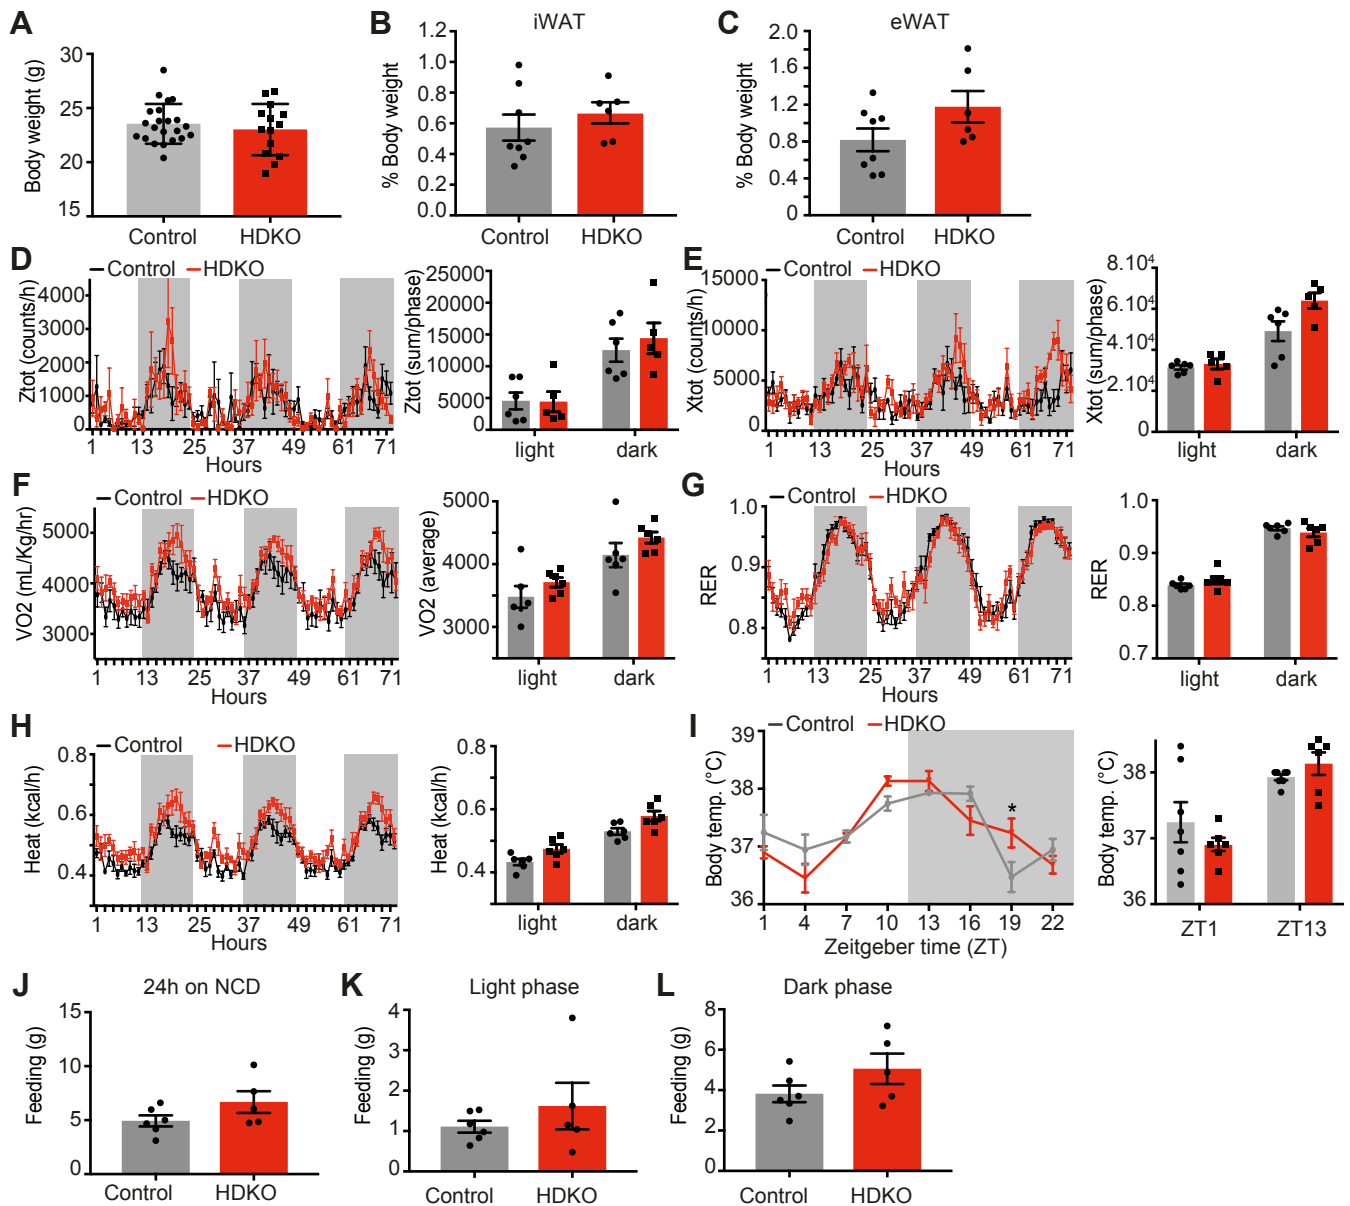

**Supplemental Figure 2. REV-ERBs deletion in non-SCN hypothalamic nuclei does not induce metabolic syndrome on NCD.** **A.** Body weight of HDKO mice and their control littermates on NCD in 14-16 week old mice ( $n = 14-22$ , mean  $\pm$  SEM). Results were compared by Mann Whitney test. **B.** Inguinal (iWAT) and **C.** epididymal (eWAT) white adipose tissues weights from HDKO mice and their control littermates on NCD in 14-16 week-old mice ( $n = 6-8$ , mean  $\pm$  SEM). Results were compared by Mann Whitney test. **D-E.** Circadian activity **F.** oxygen consumption (VO<sub>2</sub>), **G.** respiratory Exchange Ratio (RER) and **H.** heat production in HDKO mice and their control littermates on NCD in 14-16 week-old mice. D-H: Circadian recording for 3 days is displayed (left panel), as well as corresponding quantification during the light and dark phases (right panel). Results were compared by RM two-way ANOVA and Sidak's multiple comparisons test ( $n = 6$ , mean  $\pm$  SEM). **I.** Body temperature in HDKO mice and their control littermates on NCD in 14-16 week old mice ( $n = 7$ , mean  $\pm$  SEM). Circadian recording is displayed, as well as peak (ZT1) and trough (ZT13) (right panel). Results were compared by RM two-way ANOVA and Sidak's multiple comparisons test. **J-L.** Food consumption in HDKO mice and their control littermates on NCD in 14-16 week-old mice. 24h (J), light phase (K) and dark phase (L) food consumption was calculated from 3 days of recording ( $n = 5-6$ , mean  $\pm$  SEM). Results were compared by Mann Whitney test.

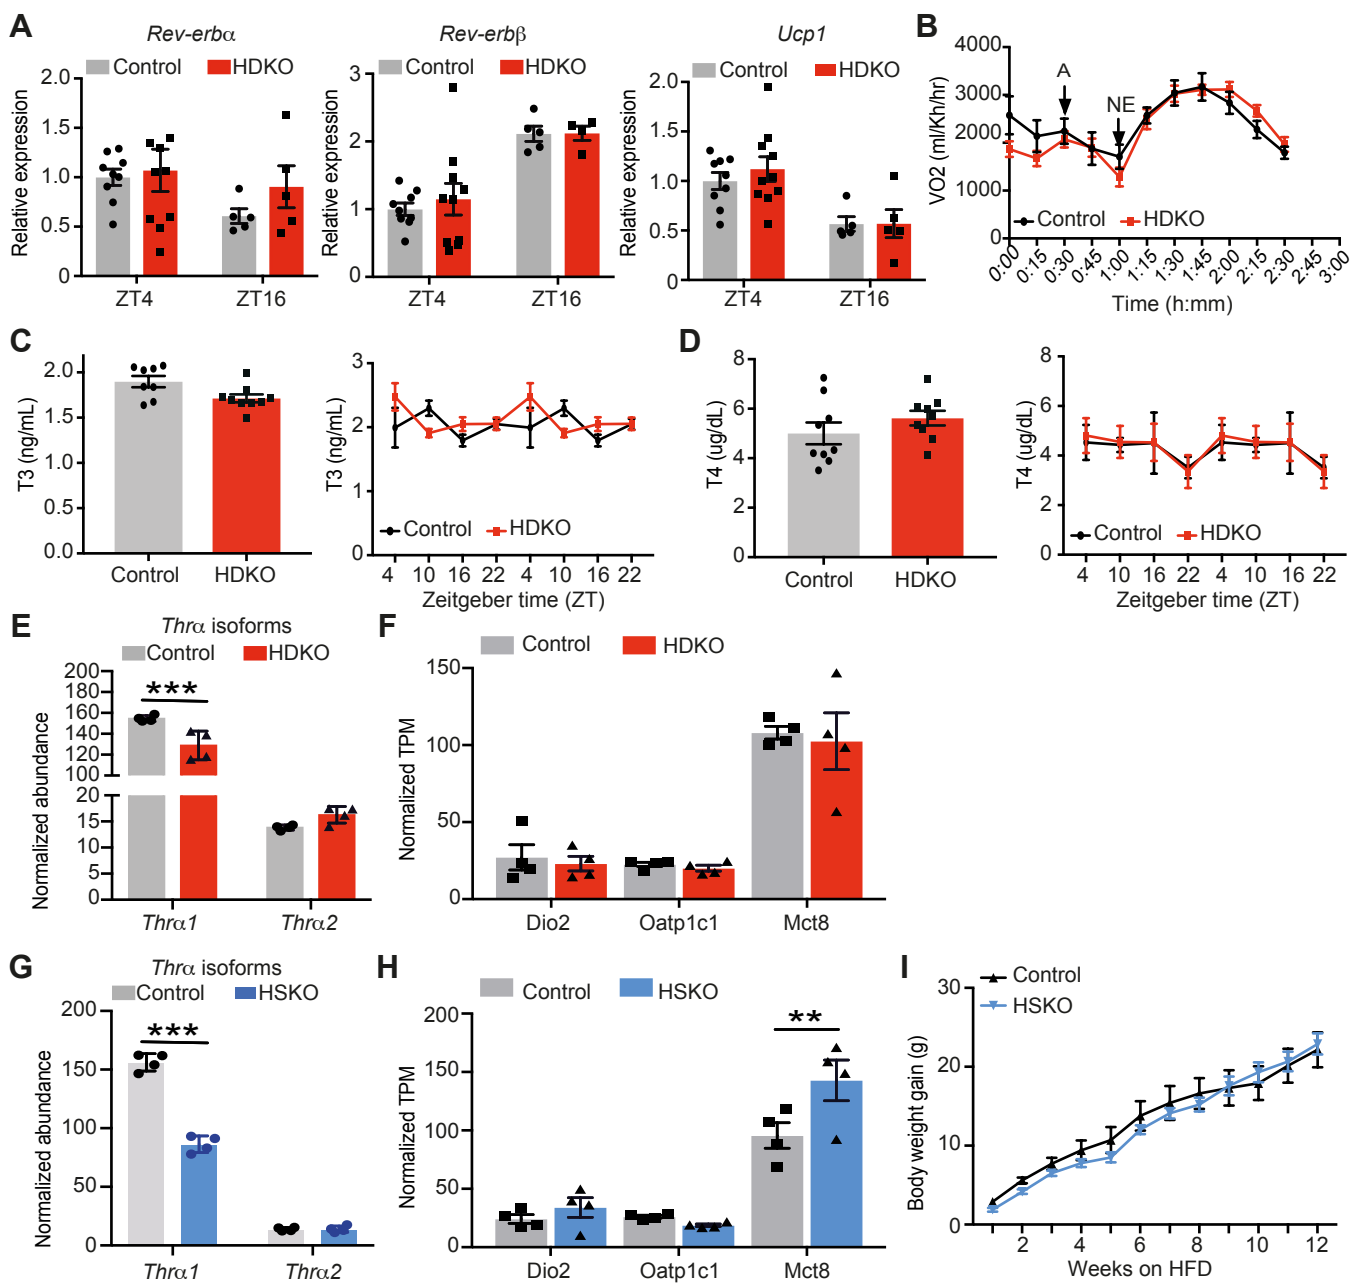

**Supplemental Figure 3. Thermogenic capacity and thyroid signaling are preserved in HDKO mice on HFD.** **A.** *Reverba*, *Reverbβ* and *Ucp1* gene expression in BAT from HDKO mice compared to their control littermates on HFD at ZT4 and ZT16 (n = 5-10, mean +/- SEM). Results were compared by two-way ANOVA and Sidak's multiple comparisons test. **B.** Oxygen consumption in response to norepinephrine (NE) at ZT1 in Control and HDKO mice on HFD. A: Anesthesia. The results were compared by two-way ANOVA (n=4/group, mean +/- SEM). **C-D.** T3 (E) and T4 (F) circulating level in control and HDKO mice on HFD. Measurements at ZT4 are presented in the left panels (n=8-9, mean +/- SEM), and compared by Mann-Whitney test. Circadian measurements are presented in the right panels (n=3, mean +/- SEM, double-plotted), and compared by two-way ANOVA. **E.** *Thrα* isoforms normalized abundance measured by RNA-seq in ARC from control and HDKO mice at ZT4 on NCD. The results were compared by two-way ANOVA (n=4/group). **F.** *Dio2*, *Mct8* and *Oatp1c1* expression measured by RNA-seq in ARC from control and HDKO mice at ZT4 on NCD. TPM: Transcripts Per Million. The results were compared by two-way ANOVA (n=4/group). **G.** *Thrα* isoforms normalized abundance measured by RNA-seq in ARC from control and HSKO mice at ZT4 on NCD. The results were compared by two-way ANOVA (n=4/group). **H.** *Dio2*, *Mct8* and *Oatp1c1* expression measured by RNA-seq in ARC from control and HSKO mice at ZT4 on NCD. TPM: Transcripts Per Million. The results were compared by two-way ANOVA (n=4/group). **I.** Body weight gain of HSKO male mice and their control littermates on HFD (n = 6-8, mean +/- SEM). Results were compared by RM two-way ANOVA and Sidak's multiple comparisons test. \*\*P < 0.01, \*\*\*P < 0.001.

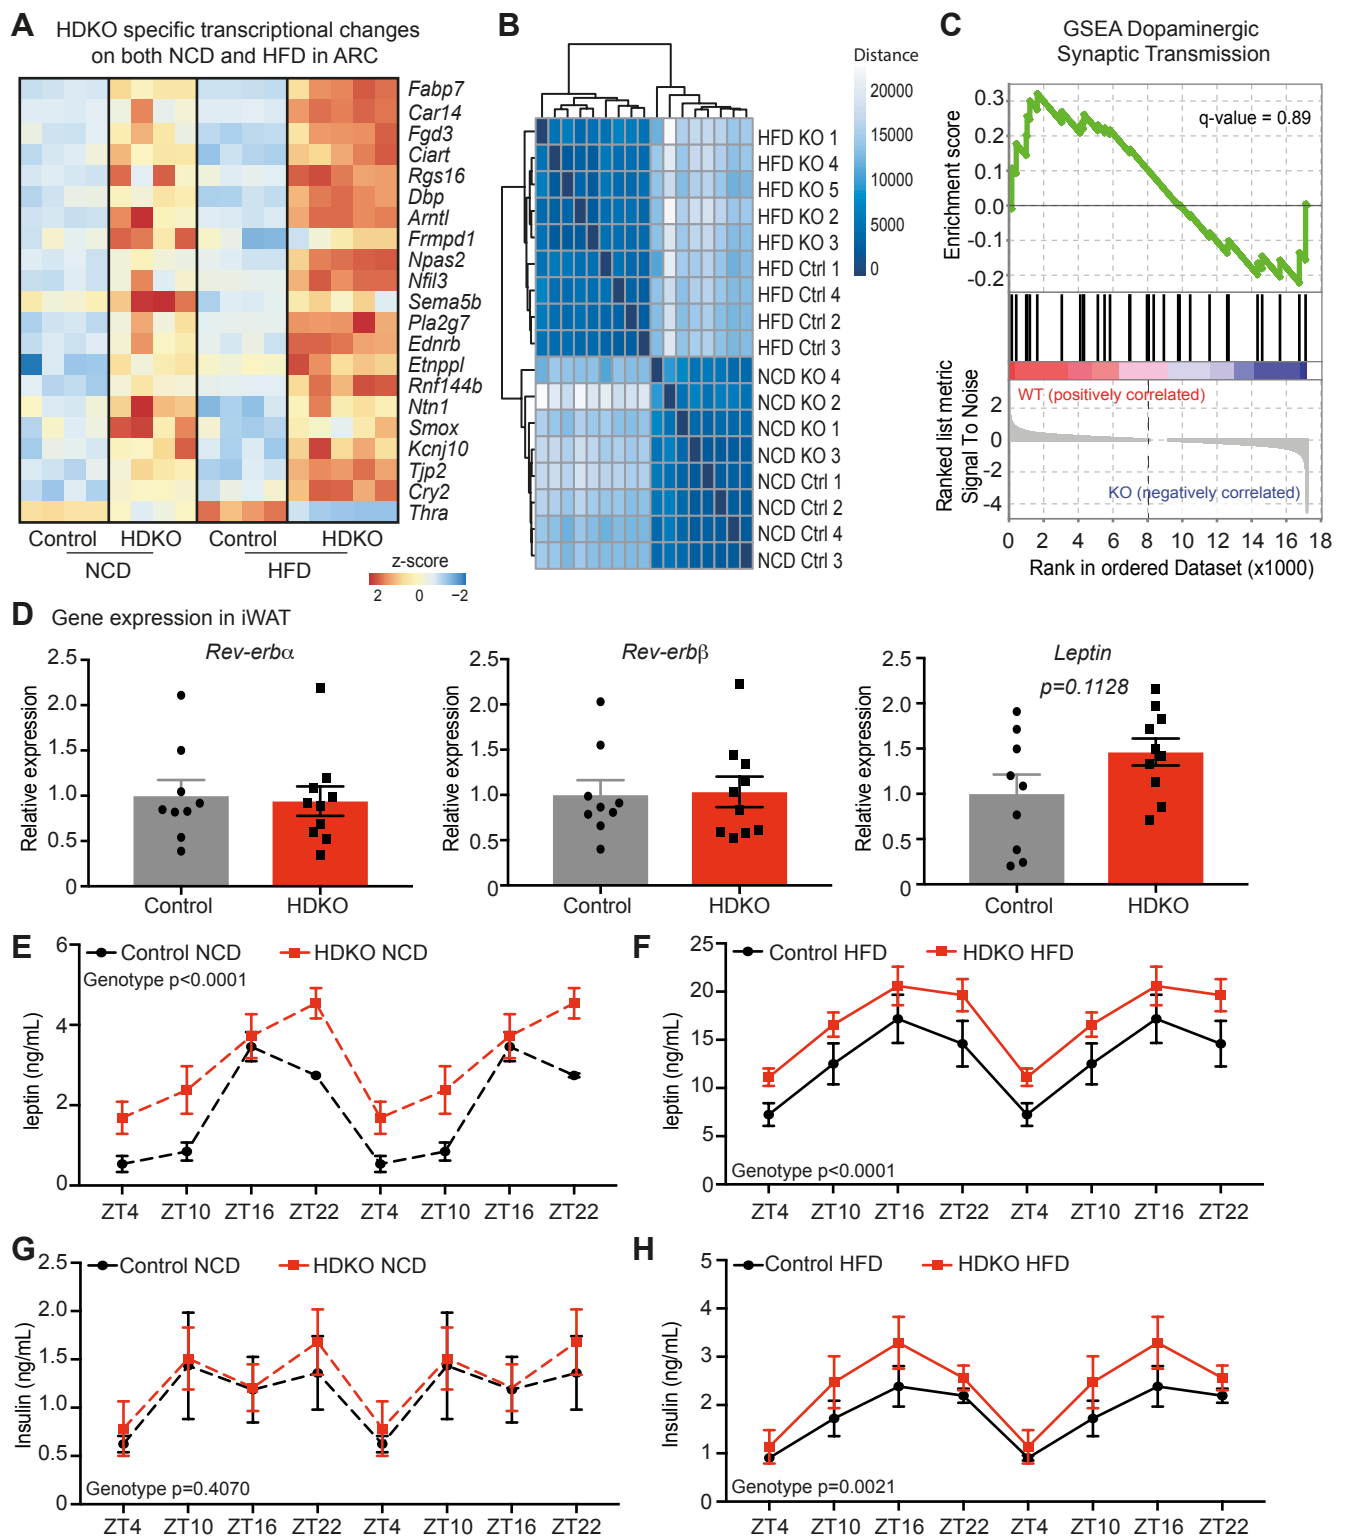

**Supplemental Figure 4. Transcriptional regulation by REV-ERBs in the ARC is highly dependent on diet.** **A.** Heatmap of genes differentially expressed in HDKO mice on both NCD and HFD in ARC. Gene expression analysis at ZT4 from HDKO mice and their control littermates on NCD and HFD in ARC (TPM > 0.1, FDR < 0.05). 2-4 independent hypothalamic nuclei punches were pooled together per biological replicate (n=4-5). **B.** Correlation heatmap of genome-wide gene expression in ARC from HDKO mice and their control littermates on NCD and HFD. **C.** GSEA analysis of dopamine signaling in DIO-HDKO specific transcriptome identified in ARC at ZT4. **D.** *Reverba*, *Reverbβ* and *Leptin* gene expression in inguinal WAT (iWAT) from HDKO mice compared to their Control littermates on HFD at ZT4 (n = 9-10, mean +/- SEM). Results were compared by Mann-Whitney test. **E-F.** Leptin circulating level in control and HDKO mice on NCD (D, n=3) and HFD (E, n=8-10). **G-H.** Insulin circulating level in control and HDKO mice on NCD (F, n=3) and HFD (G, n=5-7). E-H : Results were compared by two-way ANOVA and Sidak's multiple comparisons test (mean +/- SEM.).

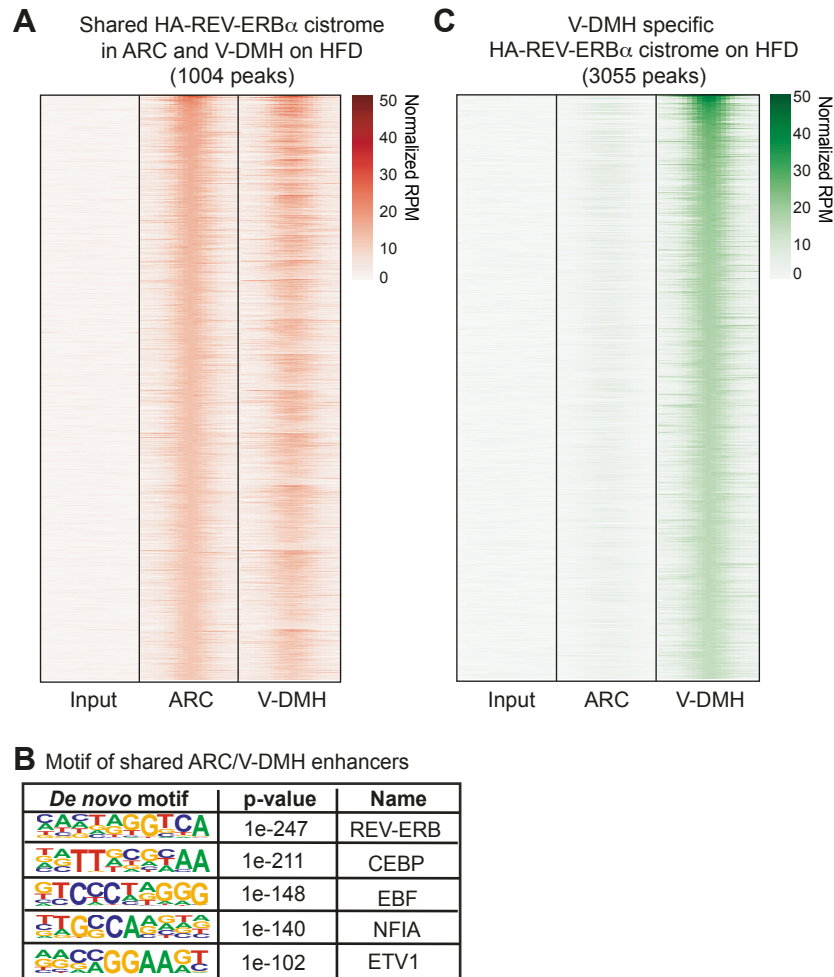

**Supplemental Figure 5. HA-REV-ERB $\alpha$  cistrome in hypothalamic nuclei. A.** Shared HA-REV-ERB $\alpha$  cistrome in ARC and VMH/DMH (V-DMH) on HFD. ChIP-seq analysis of HA immunoprecipitation in V-DMH from HA-REV-ERB $\alpha$  mice on HFD at ZT 4 (RPM > 1, > 4-fold enrichment over input, FDR < 0.0001). 10 independent hypothalamic nuclei punches were pooled together (n=1). **B.** Motif analysis of shared ARC/V-DMH cistrome of HA-REV-ERB $\alpha$  on HFD with default HOMER parameters. **C.** V-DMH-specific HA-REV-ERB $\alpha$  cistrome on HFD. ChIP-seq analysis of HA immunoprecipitation in V-DMH from HA-REV-ERB $\alpha$  mice on HFD at ZT 4 (RPM > 1, > 4-fold enrichment over input, FDR < 0.0001). 10 independent hypothalamic nuclei punches were pooled together (n=1).

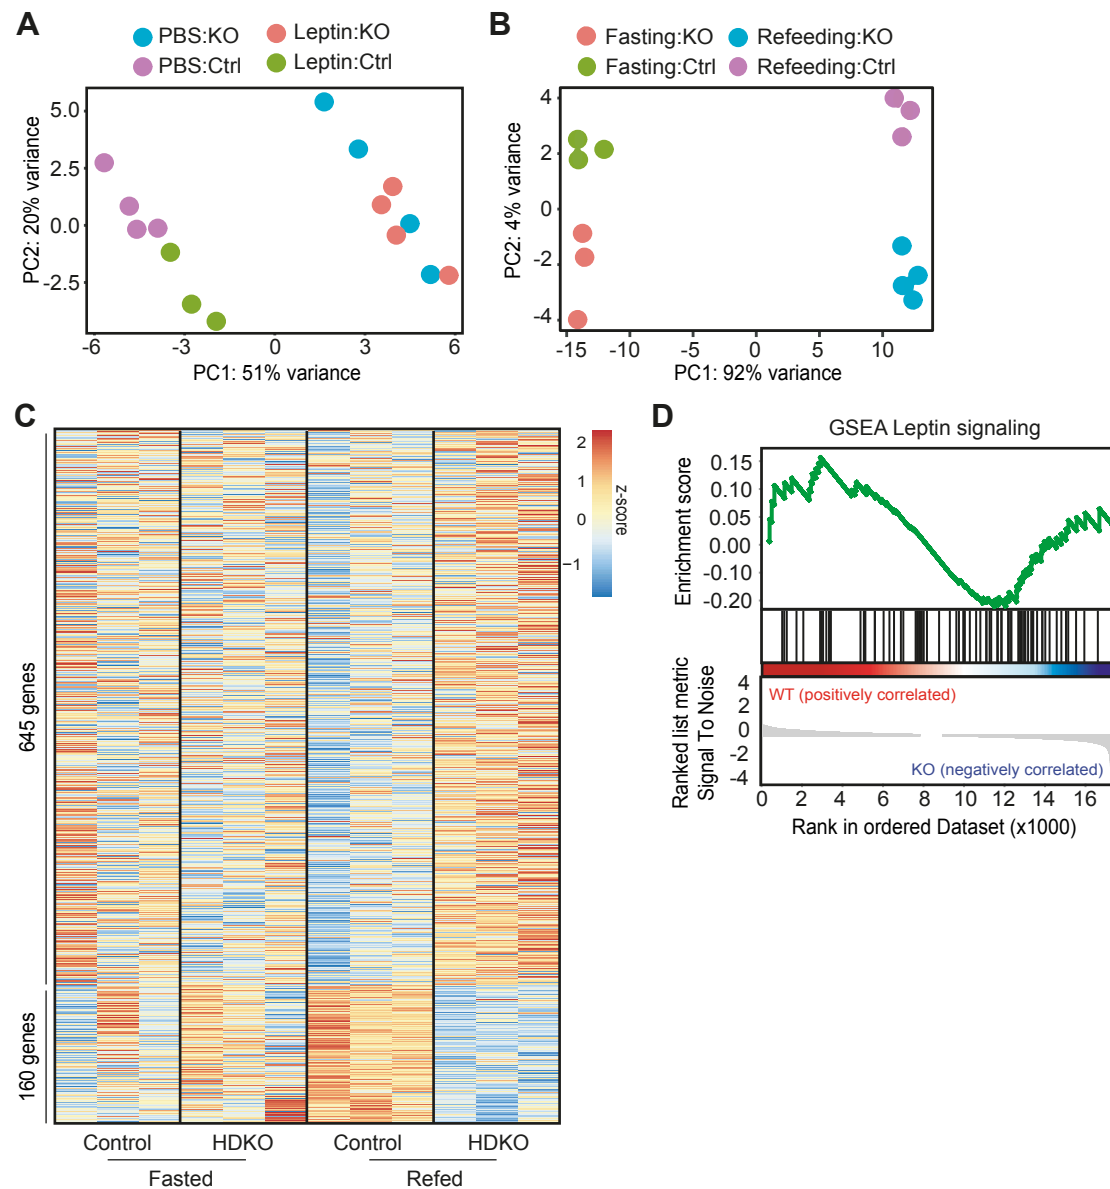

**Supplemental Figure 6. Hypothalamic REV-ERBs regulate leptin signaling in ARC during refeeding and in response to leptin.**

**A.** PCA analysis of the ARC transcriptome at ZT4 from HDKO mice and their control littermates during refeeding on HFD after injection with PBS or leptin (applied on variance stabilizing transformation values of genome-wide normalized read counts). 2 independent hypothalamic nuclei punches were pooled together per biological replicate (n=3-4). **B.** PCA analysis genome-wide of the ARC transcriptome at ZT4 from HDKO mice and their control littermates during fasting and refeeding on HFD (applied on variance stabilizing transformation values of genome-wide normalized read counts). **C.** Heatmap of the genes differentially expressed in HDKO mice in ARC after refeeding with HFD. Gene expression analysis at ZT4 from HDKO mice and their control littermates on HFD in ARC during fasting and refeeding (TPM > 0.1, FDR < 0.05). 2-4 independent hypothalamic nuclei punches were pooled together per biological replicate (n=3). **D.** GSEA analysis of leptin signaling in response to refeeding.

**Supplementary Table I – Oligonucleotides sequences**

| Gene name                         | Forward                         | Reverse                       |
|-----------------------------------|---------------------------------|-------------------------------|
| <i>Tbp</i>                        | 5'-ACCTTATGCTCAGGGCTTGG-3'      | 5'-TGCCGTAAGGCATCATTGGA-3'    |
| <i>Vip</i>                        | 5'-GAACTTCAGCACCCCTAGACAG-3'    | 5'-GAAGAGTATCAGGAATGCCAGG- 3' |
| <i>Rfrp</i>                       | 5'-CTGATTTGCCACAGAAACCC-3'      | 5'-CATCTGTTTCCACAAACGCTC-3'   |
| <i>Pomc1</i>                      | 5'- GAGGTTAAGAGCAGTGACTAAGAG-3' | 5'-AGAATCTCGGCATCTTCCAC-3'    |
| <i>Rev-erb<math>\alpha</math></i> | 5'-GTCTCTCCGTTGGCATGTCT-3'      | 5'-CCAAGTTCATGGCGCTCT-3'      |
| <i>Rev-erb<math>\beta</math></i>  | 5'-TCATGAGGATGAACAGGAACC-3'     | 5'-GAATTCGGCCAAATCGAAC-3'     |
| <i>Bmal1</i>                      | 5'-TAGGATGTGACCGAGGGAAG-3'      | 5'-TCAAACAAGCTCTGGCCAAT-3'    |
| <i>Npas2</i>                      | 5'-ATGTTTCGAGTGGAAGGAGAC-3'     | 5'-CAAGTGCATTAAAGGGCTGTG-3'   |
| <i>36B4</i>                       | 5'-TCATCCAGCAGGTGTTTGACA-3'     | 5'-GGCACCGAGGCAACAGTT-3'      |
| <i>Ucp1</i>                       | 5'-TCAGGATTGGCCTCTACGAC-3'      | 5'-TGCCACACCTCCAGTCATTA-3'    |
| <i>Leptin</i>                     | 5'-AGCCTCACTCTACTCCACAG-3'      | 5'-CCTCTACATGATTCTTGGGAGC-3'  |

**Supplementary Table II – Sequencing reads information**

|                    | Read length | Mapped reads |
|--------------------|-------------|--------------|
| NC_ARC_Ctrl1       | 100         | 9135855      |
| NC_ARC_Ctrl2       | 100         | 11210432     |
| NC_ARC_Ctrl3       | 100         | 9036833      |
| NC_ARC_Ctrl4       | 100         | 9634800      |
| NC_VMH_Ctrl1       | 100         | 15863139     |
| NC_VMH_Ctrl2       | 100         | 15246011     |
| NC_VMH_Ctrl3       | 100         | 11991329     |
| NC_VMH_Ctrl4       | 100         | 13774683     |
| NC_ARC_DDKO1       | 100         | 9455004      |
| NC_ARC_DDKO2       | 100         | 9029331      |
| NC_ARC_DDKO3       | 100         | 10753991     |
| NC_ARC_DDKO4       | 100         | 9574660      |
| NC_VMH_DDKO1       | 100         | 11799100     |
| NC_VMH_DDKO2       | 100         | 18499521     |
| NC_VMH_DDKO3       | 100         | 16492694     |
| NC_VMH_DDKO4       | 100         | 13538561     |
| HFD_ARC_ZT4_Ctrl_1 | 50          | 9826998      |
| HFD_ARC_ZT4_Ctrl_2 | 50          | 10344900     |
| HFD_ARC_ZT4_Ctrl_3 | 50          | 11245339     |
| HFD_ARC_ZT4_Ctrl_4 | 50          | 10571233     |
| HFD_ARC_ZT4_DDKO_1 | 50          | 8121775      |
| HFD_ARC_ZT4_DDKO_2 | 50          | 11271913     |
| HFD_ARC_ZT4_DDKO_3 | 50          | 10630831     |
| HFD_ARC_ZT4_DDKO_4 | 50          | 9998234      |
| HFD_ARC_ZT4_DDKO_5 | 50          | 8410302      |
| HFD_VMH_ZT4_Ctrl_1 | 50          | 11386678     |
| HFD_VMH_ZT4_Ctrl_2 | 50          | 12344407     |
| HFD_VMH_ZT4_Ctrl_3 | 50          | 9206788      |
| HFD_VMH_ZT4_Ctrl_4 | 50          | 7506687      |
| HFD_VMH_ZT4_DDKO_1 | 50          | 8654821      |
| HFD_VMH_ZT4_DDKO_2 | 50          | 9888727      |
| HFD_VMH_ZT4_DDKO_3 | 50          | 9205327      |
| HFD_VMH_ZT4_DDKO_4 | 50          | 7297991      |
| HFD_VMH_ZT4_DDKO_5 | 50          | 7146082      |

|                    |     |          |
|--------------------|-----|----------|
| ARC fasting Ctrl 1 | 50  | 6991621  |
| ARC fasting Ctrl 2 | 50  | 10985656 |
| ARC fasting Ctrl 3 | 50  | 7814786  |
| ARC fasting DKO 1  | 50  | 7537999  |
| ARC fasting DKO 2  | 50  | 11167577 |
| ARC fasting DKO 3  | 50  | 7736454  |
| ARC refeed Ctrl 1  | 50  | 17028993 |
| ARC refeed Ctrl 2  | 50  | 9111388  |
| ARC refeed Ctrl 3  | 50  | 7665491  |
| ARC refeed Ctrl 4  | 50  | 8674734  |
| ARC refeed DKO 1   | 50  | 10997463 |
| ARC refeed DKO 2   | 50  | 8362823  |
| ARC refeed DKO 3   | 50  | 7480773  |
| ARC refeed DKO 4   | 50  | 10299727 |
| ARC leptin Ctrl 1  | 50  | 10322423 |
| ARC leptin Ctrl 2  | 50  | 13656786 |
| ARC leptin Ctrl 3  | 50  | 8242173  |
| ARC leptin DKO 1   | 50  | 7659337  |
| ARC leptin DKO 2   | 50  | 8206748  |
| ARC leptin DKO 3   | 50  | 25153090 |
| ARC leptin DKO 4   | 50  | 11606218 |
| VMH fasting Ctrl 1 | 50  | 10499227 |
| VMH fasting Ctrl 2 | 50  | 10365806 |
| VMH fasting Ctrl 3 | 50  | 9969764  |
| VMH fasting DKO 1  | 50  | 11929427 |
| VMH fasting DKO 2  | 50  | 12998719 |
| VMH fasting DKO 3  | 50  | 15088753 |
| VMH leptin Ctrl 1  | 50  | 9602131  |
| VMH leptin Ctrl 2  | 50  | 9013574  |
| VMH leptin Ctrl 3  | 50  | 9238865  |
| VMH leptin DKO 1   | 50  | 12494869 |
| VMH leptin DKO 2   | 50  | 7327223  |
| VMH leptin DKO 3   | 50  | 11292334 |
| VMH leptin DKO 4   | 50  | 12716704 |
| VMH refeed Ctrl 1  | 50  | 16877139 |
| VMH refeed Ctrl 2  | 50  | 11088114 |
| VMH refeed Ctrl 3  | 50  | 13628697 |
| VMH refeed Ctrl 4  | 50  | 10596149 |
| VMH refeed DKO 1   | 50  | 949418   |
| VMH refeed DKO 2   | 50  | 7559780  |
| VMH refeed DKO 3   | 50  | 10229574 |
| VMH refeed DKO 4   | 50  | 6405892  |
| ChIP Input ARC     | 100 | 28033939 |
| ChIP Input VMH     | 100 | 28846413 |
| ChIP ARC HA        | 50  | 22639166 |
| ChIP VMH HA        | 50  | 32564386 |
| ARC ctrl 1         | 100 | 8581767  |
| ARC ctrl 2         | 100 | 10844235 |
| ARC ctrl 3         | 100 | 8814016  |
| ARC ctrl 4         | 100 | 8227836  |
| ARC SKO1           | 100 | 7656578  |
| ARC SKO2           | 100 | 10319803 |
| ARC SKO3           | 100 | 8903912  |
| ARC SKO4           | 100 | 9783570  |
